# Supplementary material for: Statins Affect the Presentation of Endothelial Chemokines by Targeting to Multivesicular Bodies
Source: PubMed Central journal article supplement (PMC3398041; doi:10.1371/journal.pone.0040673), 2012-07-16
Supplement: pone.0040673.s001.pdf [file pone.0040673.s001.pdf]

**A**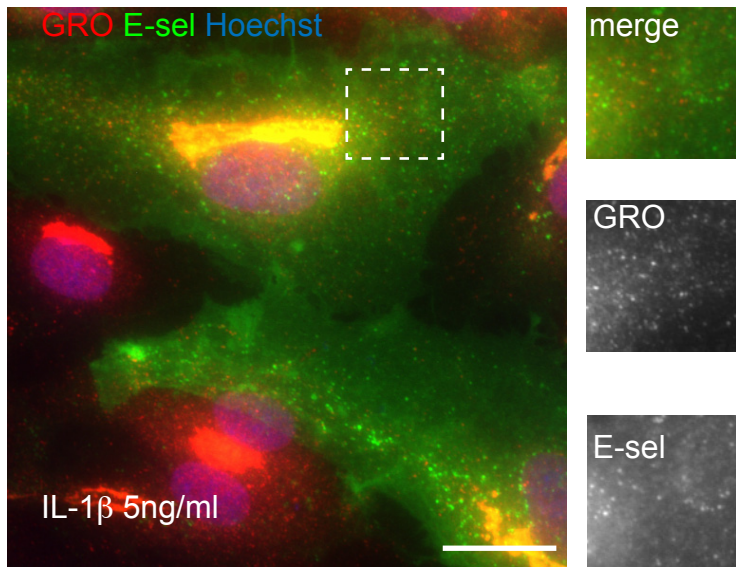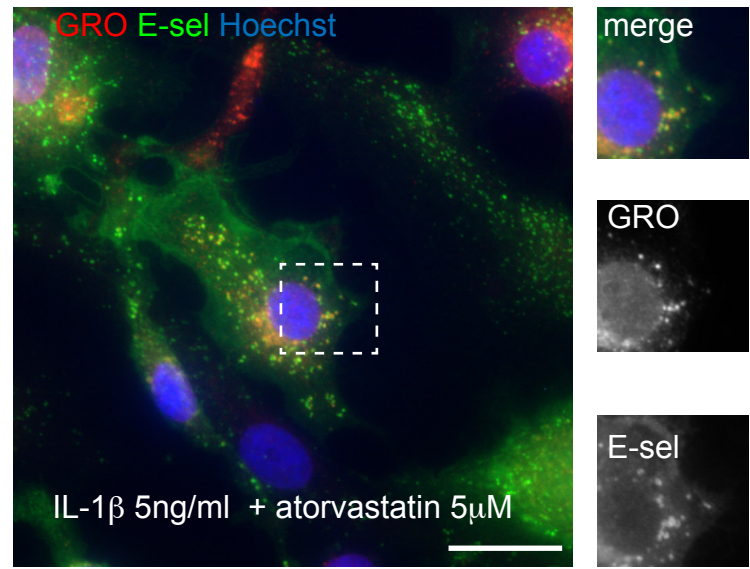**B**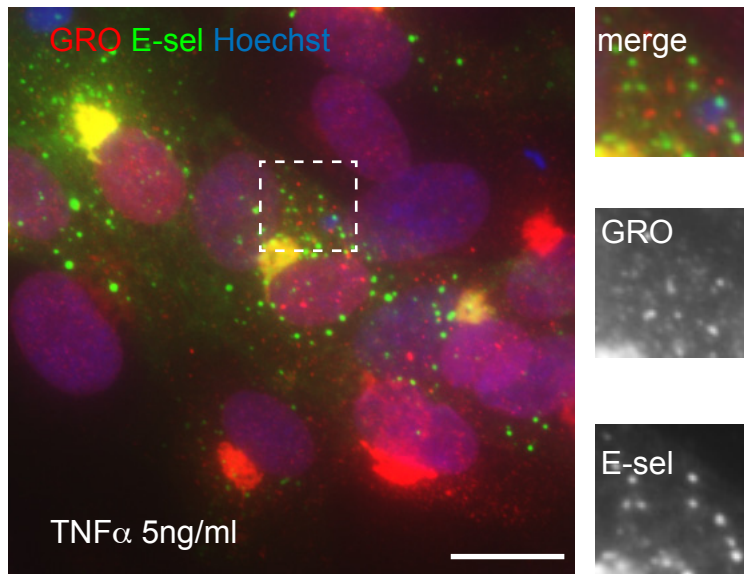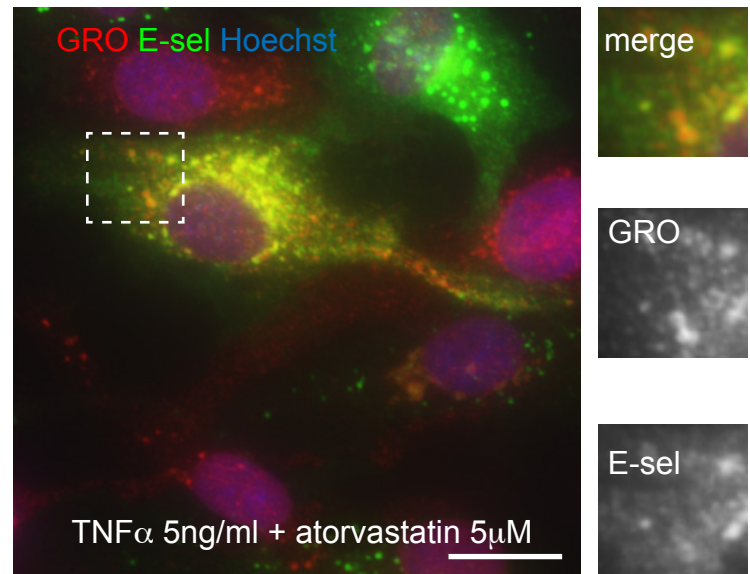**C**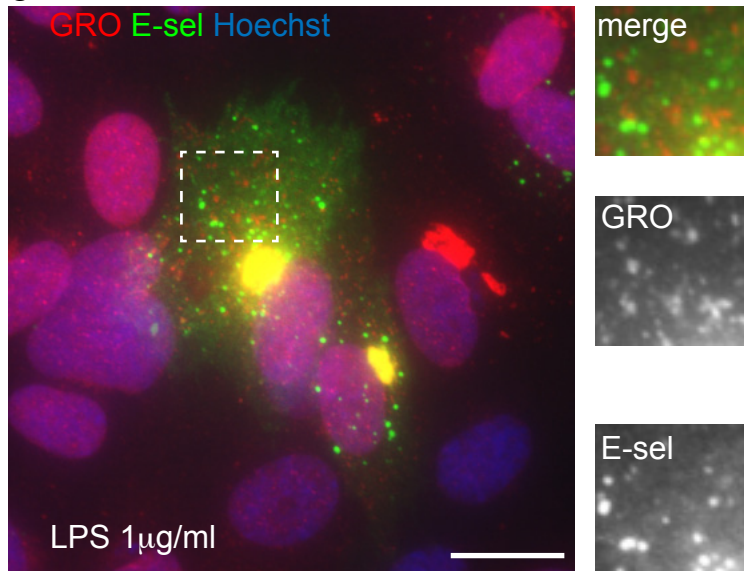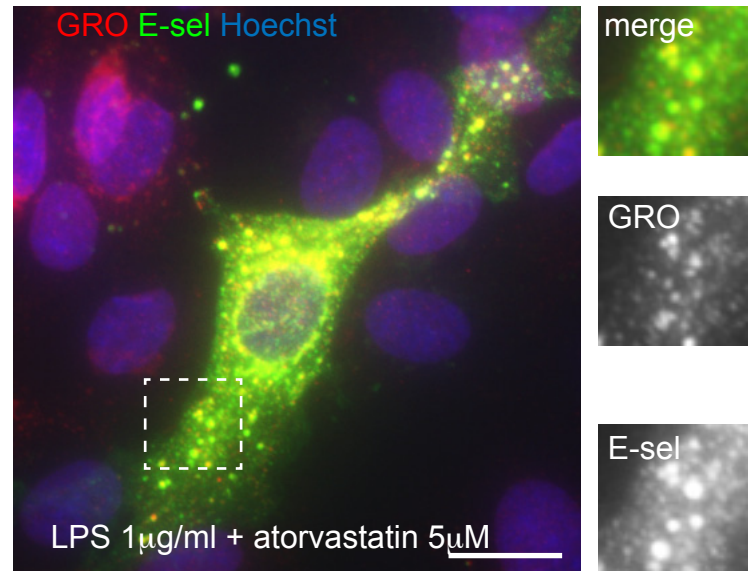

**Supplementary figure 1:** HAoEC (C-12271, Promocell) (A) and HUVEC (B-C) were pretreated with atorvastatin before stimulation with IL-1 $\beta$  (A), TNF $\alpha$  (B) or LPS (C), fixation and immunostaining for GRO- $\alpha$  and E-selectin. Scale bars are 10 $\mu$ m.
